# Supplementary material
Source: PubMed Central journal article supplement (PMC6086736)
Supplement: NIHMS965105-supplement-Supp1.pdf [file NIHMS965105-supplement-Supp1.pdf]

## Supplemental Exhibits

**Table S1.** Model inputs.

| Inputs                                     | Source                                                                                                                                     |
|--------------------------------------------|--------------------------------------------------------------------------------------------------------------------------------------------|
| Adult population by age/sex                | 2014 American Community Survey (ACS)                                                                                                       |
| Adult pop. fraction by SNAP category       | 2014 Current Population Survey                                                                                                             |
| Current food consumption                   | 2003-2012 National Health and Nutrition Examination Survey (NHANES)                                                                        |
| Mortality per 100k adults by disease       | Adjusted mortality rates from 2000-2009 National Health Interview Survey (NHIS) linked with 2000-2011 National Vital Statistics System     |
| Price effects on consumption               | 2017 systematic review and meta-analysis <sup>15</sup> and (for the SNAP-targeted interventions) randomized control trial <sup>22-23</sup> |
| Price effect gradient with respect to inc. | 2013 systematic review and meta-regression <sup>35</sup>                                                                                   |
| Relative risks for CMD from food intake    | 2017 systematic review and meta-analysis <sup>30,36</sup>                                                                                  |

**Table S2.** Assumptions about own-price elasticity (percent change in intake per percent change in price) for food and beverage intake.

|                            | Percent change in intake per percent change in price (95% CI)* |                     |                                     |
|----------------------------|----------------------------------------------------------------|---------------------|-------------------------------------|
|                            | SNAP participants                                              | Eligible            | SNAP non-participants<br>Ineligible |
| National intervention      |                                                                |                     |                                     |
| Fruits (g/d)               | -1.54 (-1.84,-1.24)                                            | -1.54 (-1.84,-1.24) | -1.31 (-1.61,-1.01)                 |
| Vegetables (g/d)           | -1.54 (-1.84,-1.24)                                            | -1.54 (-1.84,-1.24) | -1.31 (-1.61,-1.01)                 |
| Nuts (g/d)                 | -1.54 (-1.84,-1.24)                                            | -1.54 (-1.84,-1.24) | -1.31 (-1.61,-1.01)                 |
| Whole grains (g/d)         | -1.54 (-1.84,-1.24)                                            | -1.54 (-1.84,-1.24) | -1.31 (-1.61,-1.01)                 |
| SSBs (g/d)                 | -0.73 (-1.09,-0.37)                                            | -0.73 (-1.09,-0.37) | -0.62 (-0.98,-0.26)                 |
| Processed meat (g/d)       | -0.96 (-1.24,-0.68)                                            | -0.96 (-1.24,-0.68) | -0.81 (-1.09,-0.53)                 |
| SNAP targeted intervention |                                                                |                     |                                     |
| Fruits (g/d)               | -0.87 (-1.17,-0.57)                                            |                     |                                     |
| Vegetables (g/d)           | -0.87 (-1.17,-0.57)                                            |                     |                                     |
| Nuts (g/d)                 | -0.87 (-1.17,-0.57)                                            |                     |                                     |
| Whole grains (g/d)         | -0.87 (-1.17,-0.57)                                            |                     |                                     |

\*Effects of national price changes were derived from a meta-analysis of longitudinal and interventional studies<sup>11</sup> The higher price-responsiveness among lower income groups was based on a 2013 meta-regression by Green et al.<sup>23</sup> The price-responsiveness for the SNAP targeted intervention was based on the Healthy Incentives Pilot in Hampden County, MA.<sup>11b</sup>

**Table S3.** Distribution of population by age/sex and SNAP category.

| <b>Age</b> | <b>Sex</b> | <b>SNAP participation and eligibility status</b> | <b>Adult pop. by age/sex</b> | <b>Adult pop. as % of age/sex group pop.</b> | <b>Adult pop. by age, sex, and SNAP participation and eligibility</b> |
|------------|------------|--------------------------------------------------|------------------------------|----------------------------------------------|-----------------------------------------------------------------------|
| 25-34      | Male       | Participant                                      | 21964614                     | 11.4                                         | 2495793                                                               |
|            |            | Eligible, non-participant                        |                              | 10.3                                         | 2260846                                                               |
|            |            | Not eligible                                     |                              | 78.3                                         | 17207975                                                              |
| 35-44      |            | Participant                                      | 20238823                     | 10.1                                         | 2043437                                                               |
|            |            | Eligible, non-participant                        |                              | 8.5                                          | 1719764                                                               |
|            |            | Not eligible                                     |                              | 81.4                                         | 16475624                                                              |
| 45-54      |            | Participant                                      | 21337054                     | 8.2                                          | 1741483                                                               |
|            |            | Eligible, non-participant                        |                              | 7.7                                          | 1651972                                                               |
|            |            | Not eligible                                     |                              | 84.1                                         | 17943598                                                              |
| 55-64      |            | Participant                                      | 19297483                     | 7.6                                          | 1458982                                                               |
|            |            | Eligible, non-participant                        |                              | 8.6                                          | 1668624                                                               |
|            |            | Not eligible                                     |                              | 83.8                                         | 16169876                                                              |
| 65-74      |            | Participant                                      | 12394318                     | 5.4                                          | 674612                                                                |
|            |            | Eligible, non-participant                        |                              | 7.2                                          | 895101                                                                |
|            |            | Not eligible                                     |                              | 87.3                                         | 10824999                                                              |
| 75+        |            | Participant                                      | 7844505                      | 4.9                                          | 384002                                                                |
|            |            | Eligible, non-participant                        |                              | 9.4                                          | 739097                                                                |
|            |            | Not eligible                                     |                              | 85.7                                         | 6721406                                                               |
| 25-34      | Female     | Participant                                      | 21379638                     | 17.3                                         | 3693356                                                               |
|            |            | Eligible, non-participant                        |                              | 11.2                                         | 2383875                                                               |
|            |            | Not eligible                                     |                              | 71.6                                         | 15302410                                                              |
| 35-44      |            | Participant                                      | 20569803                     | 12.9                                         | 2654525                                                               |
|            |            | Eligible, non-participant                        |                              | 9.5                                          | 1961514                                                               |
|            |            | Not eligible                                     |                              | 77.6                                         | 15953762                                                              |
| 45-54      |            | Participant                                      | 22027506                     | 10.1                                         | 2217725                                                               |
|            |            | Eligible, non-participant                        |                              | 8.2                                          | 1796927                                                               |
|            |            | Not eligible                                     |                              | 81.8                                         | 18012852                                                              |
| 55-64      |            | Participant                                      | 20731770                     | 9.4                                          | 1941518                                                               |
|            |            | Eligible, non-participant                        |                              | 9.9                                          | 2050015                                                               |
|            |            | Not eligible                                     |                              | 80.7                                         | 16740239                                                              |
| 65-74      |            | Participant                                      | 14091125                     | 8.2                                          | 1149699                                                               |
|            |            | Eligible, non-participant                        |                              | 9.9                                          | 1399421                                                               |
|            |            | Not eligible                                     |                              | 81.9                                         | 11542005                                                              |
| 75+        |            | Participant                                      | 11823588                     | 8.5                                          | 1009576                                                               |
|            |            | Eligible, non-participant                        |                              | 18.2                                         | 2150168                                                               |
|            |            | Not eligible                                     |                              | 73.3                                         | 8663845                                                               |

**Table S4.** Relative risks (RR) of mortality for 1-serving/day increases in consumption of specific food and beverage items.

| Category                        | Age                                  | Diabetes         |                  | CHD              |                  | Hemorrhagic stroke |                  | Ischemic stroke  |                  |
|---------------------------------|--------------------------------------|------------------|------------------|------------------|------------------|--------------------|------------------|------------------|------------------|
|                                 |                                      | RR               | (UI)             | RR               | (UI)             | RR                 | (UI)             | RR               | (UI)             |
| Direct effects                  |                                      |                  |                  |                  |                  |                    |                  |                  |                  |
| Fruit<br>per each<br>100g/d     | 25-34                                |                  |                  | 0.92 (0.87,0.97) |                  | 0.63 (0.49,0.81)   |                  | 0.83 (0.76,0.90) |                  |
|                                 | 35-44                                |                  |                  | 0.92 (0.87,0.97) |                  | 0.64 (0.50,0.82)   |                  | 0.83 (0.77,0.90) |                  |
|                                 | 45-54                                |                  |                  | 0.93 (0.89,0.97) |                  | 0.68 (0.56,0.84)   |                  | 0.86 (0.80,0.92) |                  |
|                                 | 55-64                                |                  |                  | 0.94 (0.91,0.98) |                  | 0.73 (0.61,0.87)   |                  | 0.88 (0.83,0.93) |                  |
|                                 | 65-74                                |                  |                  | 0.95 (0.92,0.98) |                  | 0.77 (0.67,0.89)   |                  | 0.90 (0.86,0.94) |                  |
|                                 | 75+                                  |                  |                  | 0.97 (0.96,0.99) |                  | 0.86 (0.80,0.92)   |                  | 0.94 (0.92,0.96) |                  |
|                                 | Nuts<br>per each<br>4.05g/d          | 25-34            | 0.95 (0.92,0.98) |                  | 0.89 (0.85,0.93) |                    |                  |                  |                  |
|                                 | 35-44                                | 0.95 (0.93,0.98) |                  | 0.89 (0.85,0.93) |                  |                    |                  |                  |                  |
|                                 | 45-54                                | 0.96 (0.94,0.98) |                  | 0.91 (0.87,0.94) |                  |                    |                  |                  |                  |
|                                 | 55-64                                | 0.97 (0.95,0.98) |                  | 0.92 (0.89,0.95) |                  |                    |                  |                  |                  |
|                                 | 65-74                                | 0.97 (0.96,0.99) |                  | 0.93 (0.91,0.96) |                  |                    |                  |                  |                  |
|                                 | 75+                                  | 0.98 (0.98,0.99) |                  | 0.96 (0.95,0.97) |                  |                    |                  |                  |                  |
| Vegetable<br>per each<br>100g/d | 25-34                                |                  |                  | 0.93 (0.89,0.97) |                  | 0.76 (0.61,0.95)   |                  | 0.76 (0.64,0.90) |                  |
|                                 | 35-44                                |                  |                  | 0.93 (0.90,0.97) |                  | 0.77 (0.62,0.95)   |                  | 0.77 (0.66,0.90) |                  |
|                                 | 45-54                                |                  |                  | 0.94 (0.91,0.97) |                  | 0.80 (0.67,0.96)   |                  | 0.80 (0.70,0.92) |                  |
|                                 | 55-64                                |                  |                  | 0.95 (0.93,0.98) |                  | 0.83 (0.72,0.96)   |                  | 0.83 (0.74,0.93) |                  |
|                                 | 65-74                                |                  |                  | 0.96 (0.94,0.98) |                  | 0.86 (0.76,0.97)   |                  | 0.86 (0.78,0.94) |                  |
|                                 | 75+                                  |                  |                  | 0.98 (0.97,0.99) |                  | 0.92 (0.86,0.97)   |                  | 0.92 (0.87,0.96) |                  |
|                                 | Whole<br>grains<br>per each<br>50g/d | 25-34            | 0.83 (0.76,0.90) |                  | 0.95 (0.91,0.99) |                    | 0.87 (0.80,0.96) |                  | 0.87 (0.80,0.96) |
|                                 | 35-44                                | 0.83 (0.77,0.90) |                  | 0.95 (0.92,0.99) |                  | 0.88 (0.81,0.96)   |                  | 0.88 (0.81,0.96) |                  |
|                                 | 45-54                                | 0.86 (0.80,0.92) |                  | 0.96 (0.93,0.99) |                  | 0.90 (0.83,0.97)   |                  | 0.90 (0.83,0.97) |                  |
|                                 | 55-64                                | 0.88 (0.83,0.93) |                  | 0.97 (0.94,0.99) |                  | 0.91 (0.86,0.97)   |                  | 0.91 (0.86,0.97) |                  |
|                                 | 65-74                                | 0.90 (0.86,0.94) |                  | 0.97 (0.95,0.99) |                  | 0.93 (0.88,0.98)   |                  | 0.93 (0.88,0.98) |                  |
|                                 | 75+                                  | 0.94 (0.92,0.96) |                  | 0.98 (0.97,0.99) |                  | 0.96 (0.93,0.98)   |                  | 0.96 (0.93,0.98) |                  |
| Processe<br>d<br>meat           | 25-34                                | 1.84 (1.38,2.46) |                  | 1.59 (1.17,2.18) |                  |                    |                  |                  |                  |
|                                 | 35-44                                | 1.79 (1.36,2.37) |                  | 1.56 (1.16,2.11) |                  |                    |                  |                  |                  |

|                            |       |                  |                  |                  |                  |
|----------------------------|-------|------------------|------------------|------------------|------------------|
| per each                   | 45-54 | 1.64 (1.30,2.08) | 1.46 (1.14,1.88) |                  |                  |
| 100g/d                     | 55-64 | 1.51 (1.24,1.83) | 1.37 (1.11,1.69) |                  |                  |
|                            | 65-74 | 1.41 (1.20,1.65) | 1.30 (1.09,1.54) |                  |                  |
|                            | 75+   | 1.22 (1.12,1.32) | 1.16 (1.07,1.27) |                  |                  |
| SSB                        | 25-34 | 1.34 (1.14,1.59) | 1.32 (1.19,1.47) |                  |                  |
| per each                   | 35-44 | 1.33 (1.13,1.56) | 1.31 (1.18,1.45) |                  |                  |
| 8oz serv/d                 | 45-54 | 1.27 (1.11,1.46) | 1.26 (1.15,1.37) |                  |                  |
|                            | 55-64 | 1.22 (1.09,1.36) | 1.21 (1.13,1.30) |                  |                  |
|                            | 65-74 | 1.18 (1.07,1.29) | 1.17 (1.10,1.24) |                  |                  |
|                            | 75+   | 1.10 (1.05,1.15) | 1.09 (1.06,1.13) |                  |                  |
| Effects mediated by BMI:** |       |                  |                  |                  |                  |
| SSB                        | 25-34 | 3.55 (2.41,5.23) | 1.79 (1.56,2.06) | 3.04 (2.24,4.11) | 2.09 (1.81,2.40) |
| per each                   | 35-44 | 3.07 (2.28,4.15) | 1.66 (1.51,1.84) | 2.54 (1.96,3.28) | 1.86 (1.67,2.08) |
| 8oz serv/d                 | 45-54 | 2.66 (2.15,3.30) | 1.55 (1.46,1.64) | 2.10 (1.66,2.66) | 1.67 (1.53,1.81) |
|                            | 55-64 | 2.32 (2.04,2.63) | 1.44 (1.40,1.48) | 1.75 (1.44,2.13) | 1.50 (1.40,1.60) |
|                            | 65-74 | 2.03 (1.95,2.11) | 1.35 (1.32,1.38) | 1.48 (1.29,1.71) | 1.35 (1.28,1.41) |
|                            | 75+   | 1.52 (1.40,1.65) | 1.19 (1.13,1.25) | 1.13 (1.03,1.23) | 1.11 (1.06,1.15) |

\*\*For SSB effects, mediated effects show additional relative risk per one kg/m<sup>2</sup> increase in BMI for each 8oz serv/d.

**Table S5.** Change in intake for larger subsidies and taxes.\*

|                         | Change in intake for 30% subsidy (+) or tax (-)                        |                       |                  |
|-------------------------|------------------------------------------------------------------------|-----------------------|------------------|
|                         | SNAP participants                                                      | SNAP non-participants |                  |
|                         |                                                                        | Eligible              | Ineligible       |
| <b>Subsidized foods</b> |                                                                        |                       |                  |
| fruit (g/d)             | 35.1 (31.9,37.9)                                                       | 45.3 (42,48)          | 44.8 (42.8,46.8) |
| vegetables (g/d)        | 64.7 (61.9,67.5)                                                       | 79 (74.4,83.2)        | 73.1 (71.1,74.7) |
| nuts (g/d)              | 2.59 (2.22,2.96)                                                       | 2.96 (2.49,3.37)      | 4.28 (4.05,4.52) |
| whole grains (g/d)      | 6.24 (5.59,6.88)                                                       | 7.3 (6.65,7.99)       | 7.66 (7.35,7.94) |
| <b>Taxed foods</b>      |                                                                        |                       |                  |
| SSB (g/d)               | -113 (-104,-122)                                                       | -90 (-84,-97)         | -54 (-52,-57)    |
| processed meat (g/d)    | -9.4 (-8.7,-10)                                                        | -8.2 (-7.6,-8.7)      | -7.6 (-7.3,-7.9) |
|                         | Change in intake for 10% subsidy (+) and a 30% SNAP healthy incentive† |                       |                  |
|                         | SNAP participants                                                      |                       |                  |
| <b>Subsidized foods</b> |                                                                        |                       |                  |
| fruit (g/d)             | 34.6 (31.4,37.3)                                                       |                       |                  |
| vegetables (g/d)        | 63.7 (61,66.5)                                                         |                       |                  |
| nuts (g/d)              | 2.55 (2.18,2.91)                                                       |                       |                  |
| whole grains (g/d)      | 6.15 (5.51,6.78)                                                       |                       |                  |

\*See Table 2 for 10% subsidy and tax. See Table S2 for underlying elasticity assumptions. †In the SNAP healthy incentive, the participant receives the 30% incentive for healthy purchases with the SNAP EBT card in addition to the 10% national subsidy.

**Table S6.** Total cardiometabolic disease (CMD) deaths averted (as % of total CMD deaths) for six policy interventions.\*

|                                                    | SNAP participants | SNAP non-participants |                  |
|----------------------------------------------------|-------------------|-----------------------|------------------|
|                                                    |                   | Eligible              | Ineligible       |
| <b>CMD: Baseline</b>                               |                   |                       |                  |
| CMD deaths/y per 100k adults                       | 415               | 584                   | 319              |
| Prevented deaths as % of total CMD deaths (95% UI) |                   |                       |                  |
| 1a. (10/0/0)                                       | 2.6 (2.4,2.8)     | 2.7 (2.4,3.0)         | 2.6 (2.4,2.8)    |
| 1b. (10/10/0)                                      | 5.9 (5.4,7.4)     | 4.8 (4.4,5.2)         | 4.1 (3.8,4.5)    |
| 2a. (30/0/0)                                       | 7.1 (6.5,7.7)     | 7.4 (6.7,8.1)         | 7.0 (6.4,7.6)    |
| 2b. (30/30/0)                                      | 15.9 (14.6,17.9)  | 13 (12,14.1)          | 11.3 (10.5,12.2) |
| 3a. (10/0/30)                                      | 7.0 (6.4,7.7)     | 2.7 (2.4,3.0)         | 2.6 (2.4,2.8)    |
| 3b. (10/10/30)                                     | 10.2 (9.5,11.6)   | 4.8 (4.4,5.2)         | 4.1 (3.8,4.5)    |

\*Supporting data for Figure 1 (A). Disaggregated results by disease are in Table 3. Six subsidy and tax policy interventions defined in Table 1: (1a) 10% subsidy, (1b) 10% subsidy and 10% tax, (2a) 30% subsidy, (2b) 30% subsidy and 30% tax, (3a) 10% subsidy and additional 30% subsidy for SNAP purchases, (3b) 10% subsidy, 10% tax, and additional 30% subsidy for SNAP purchases.

**Table S7.** All cardiometabolic disease (CMD) deaths averted (per 100k population) for six policy interventions.\*

|                                             | SNAP participants | SNAP non-participants |                  |
|---------------------------------------------|-------------------|-----------------------|------------------|
|                                             |                   | Eligible              | Ineligible       |
| <b>CMD: Baseline</b>                        |                   |                       |                  |
| CMD deaths/y per 100k adults                | 415               | 584                   | 319              |
| Prevented deaths/y per 100k adults (95% UI) |                   |                       |                  |
| 1a. (10/0/0)                                | 10.7 (9.8,11.7)   | 15.7 (14.3,17.3)      | 8.2 (7.5,8.9)    |
| 1b. (10/10/0)                               | 24.7 (22.5,30.6)  | 27.9 (25.5,30.5)      | 13.2 (12.2,14.3) |
| 2a. (30/0/0)                                | 29.4 (27.1,32.0)  | 43.0 (39.2,47.2)      | 22.2 (20.5,24.1) |
| 2b. (30/30/0)                               | 66.0 (60.6,74.4)  | 75.8 (69.8,82.3)      | 36.1 (33.4,38.8) |
| 3a. (10/0/30)                               | 29.1 (26.7,32.1)  | 15.7 (14.3,17.3)      | 8.2 (7.5,8.9)    |
| 3b. (10/10/30)                              | 42.4 (39.4,48.3)  | 27.9 (25.5,30.5)      | 13.2 (12.2,14.3) |

\*Supporting data for Figure 1 (B). Disaggregated results by disease are in Table 4. Six subsidy and tax policy interventions defined in Table 1: (1a) 10% subsidy, (1b) 10% subsidy and 10% tax, (2a) 30% subsidy, (2b) 30% subsidy and 30% tax, (3a) 10% subsidy and additional 30% subsidy for SNAP purchases, (3b) 10% subsidy, 10% tax, and additional 30% subsidy for SNAP purchases.



**Table S8.** All cardiometabolic disease (CMD) deaths averted (in total) for six food price subsidy and tax interventions.\*

|                                       | SNAP participants | SNAP non-participants |                     |
|---------------------------------------|-------------------|-----------------------|---------------------|
|                                       |                   | Eligible              | Ineligible          |
| U.S. adult population in 2014 (1000s) | 21465             | 20677                 | 171559              |
| <b>CHD</b>                            |                   |                       |                     |
| Prevented deaths/y (95% UI)           |                   |                       |                     |
| 1a. (10/0/0)                          | 1176 (1033,1329)  | 1642 (1436,1861)      | 7105 (6314,7972)    |
| 1b. (10/10/0)                         | 2265 (1968,2809)  | 2579 (2268,2933)      | 9688 (8607,10819)   |
| 2a. (30/0/0)                          | 3248 (2865,3665)  | 4499 (3944,5091)      | 19244 (17187,21514) |
| 2b. (30/30/0)                         | 6145 (5409,7284)  | 7044 (6245,7950)      | 26408 (23585,29338) |
| 3a. (10/0/30)                         | 3221 (2820,3661)  | 1642 (1436,1861)      | 7105 (6314,7972)    |
| 3b. (10/10/30)                        | 4280 (3796,4972)  | 2579 (2268,2933)      | 9688 (8607,10819)   |
| <b>Stroke</b>                         |                   |                       |                     |
| Prevented deaths/y (95% UI)           |                   |                       |                     |
| 1a. (10/0/0)                          | 955 (833,1077)    | 1438 (1213,1657)      | 6175 (5327,6980)    |
| 1b. (10/10/0)                         | 978 (856,1099)    | 1460 (1236,1681)      | 6231 (5378,7031)    |
| 2a. (30/0/0)                          | 2584 (2274,2893)  | 3891 (3293,4460)      | 16575 (14359,18659) |
| 2b. (30/30/0)                         | 2648 (2337,2959)  | 3950 (3362,4512)      | 16731 (14498,18806) |
| 3a. (10/0/30)                         | 2554 (2234,2898)  | 1438 (1213,1657)      | 6175 (5327,6980)    |
| 3b. (10/10/30)                        | 2575 (2256,2920)  | 1460 (1236,1681)      | 6231 (5378,7031)    |
| <b>Diabetes</b>                       |                   |                       |                     |
| Prevented deaths/y (95% UI)           |                   |                       |                     |
| 1a. (10/0/0)                          | 161 (135,192)     | 165 (140,194)         | 790 (680,904)       |
| 1b. (10/10/0)                         | 1106 (932,1460)   | 831 (718,996)         | 3129 (2768,3580)    |
| 2a. (30/0/0)                          | 458 (384,546)     | 470 (399,552)         | 2231 (1923,2553)    |
| 2b. (30/30/0)                         | 2967 (2549,3680)  | 2293 (1997,2654)      | 8793 (7832,9994)    |
| 3a. (10/0/30)                         | 454 (373,556)     | 165 (140,194)         | 790 (680,904)       |
| 3b. (10/10/30)                        | 1387 (1195,1754)  | 831 (718,996)         | 3129 (2768,3580)    |

**CMD**

Prevented deaths/y  
adults (95% UI)

|                |                     |                     |                     |
|----------------|---------------------|---------------------|---------------------|
| 1a. (10/0/0)   | 2293 (2111,2506)    | 3251 (2953,3582)    | 14075 (12933,15290) |
| 1b. (10/10/0)  | 5292 (4822,6572)    | 5766 (5279,6301)    | 22670 (20966,24468) |
| 2a. (30/0/0)   | 6313 (5821,6878)    | 8887 (8097,9751)    | 38159 (35171,41377) |
| 2b. (30/30/0)  | 14165 (13017,15967) | 15673 (14442,17027) | 61853 (57292,66577) |
| 3a. (10/0/30)  | 6247 (5729,6895)    | 3251 (2953,3582)    | 14075 (12933,15290) |
| 3b. (10/10/30) | 9110 (8449,10362)   | 5766 (5279,6301)    | 22670 (20966,24468) |

\*See Table 4 and Table S7 for corresponding results per 100k adults.

**Table S9.** All cardiometabolic disease (CMD) deaths averted (per 100,000 adults) for six food price subsidy and tax interventions, disaggregated by age and sex.\*

|                   |        |                       | SNAP participants                       | SNAP non-participants |                   |
|-------------------|--------|-----------------------|-----------------------------------------|-----------------------|-------------------|
|                   |        |                       |                                         | Eligible              | Ineligible        |
| Adults<br>(1000s) |        |                       | 21465                                   | 20677                 | 171559            |
| Age               | S<br>x | S<br>C<br>E<br>E<br>N | Attrib. deaths per 100k adults (95% UI) |                       |                   |
| 25-34             | M      | 1a                    | 0.53 (0.41,0.67)                        | 0.38 (0.28,0.50)      | 0.28 (0.21,0.35)  |
| 25-34             | M      | 1b                    | 1.90 (1.39,2.64)                        | 1.46 (1.06,1.95)      | 0.63 (0.47,0.82)  |
| 25-34             | M      | 2a                    | 1.47 (1.13,1.82)                        | 1.05 (0.79,1.34)      | 0.76 (0.57,0.92)  |
| 25-34             | M      | 2b                    | 4.66 (3.61,5.89)                        | 3.62 (2.77,4.57)      | 1.60 (1.25,1.98)  |
| 25-34             | M      | 3a                    | 1.47 (1.10,1.84)                        | 0.38 (0.28,0.50)      | 0.28 (0.21,0.35)  |
| 25-34             | M      | 3b                    | 2.74 (2.13,3.46)                        | 1.46 (1.06,1.95)      | 0.63 (0.47,0.82)  |
| 25-34             | F      | 1a                    | 0.15 (0.11,0.18)                        | 0.34 (0.26,0.42)      | 0.20 (0.14,0.26)  |
| 25-34             | F      | 1b                    | 0.66 (0.46,1.00)                        | 1.36 (0.88,3.22)      | 0.35 (0.27,0.49)  |
| 25-34             | F      | 2a                    | 0.40 (0.30,0.49)                        | 0.91 (0.70,1.09)      | 0.54 (0.38,0.67)  |
| 25-34             | F      | 2b                    | 1.64 (1.23,2.25)                        | 3.26 (2.28,5.47)      | 0.91 (0.72,1.17)  |
| 25-34             | F      | 3a                    | 0.40 (0.30,0.50)                        | 0.34 (0.26,0.42)      | 0.20 (0.14,0.26)  |
| 25-34             | F      | 3b                    | 0.88 (0.69,1.21)                        | 1.36 (0.88,3.22)      | 0.35 (0.27,0.49)  |
| 35-44             | M      | 1a                    | 4.06 (3.16,5.04)                        | 1.69 (1.23,2.19)      | 1.29 (1.01,1.59)  |
| 35-44             | M      | 1b                    | 13.17 (9.74,17.77)                      | 5.76 (4.22,7.59)      | 3.40 (2.46,4.74)  |
| 35-44             | M      | 2a                    | 11.32 (8.89,13.85)                      | 4.58 (3.37,5.80)      | 3.45 (2.73,4.22)  |
| 35-44             | M      | 2b                    | 32.82 (25.60,41.17)                     | 14.74 (11.24,18.51)   | 8.57 (6.47,11.01) |
| 35-44             | M      | 3a                    | 11.20 (8.59,14.25)                      | 1.69 (1.23,2.19)      | 1.29 (1.01,1.59)  |
| 35-44             | M      | 3b                    | 19.65 (15.62,24.15)                     | 5.76 (4.22,7.59)      | 3.40 (2.46,4.74)  |
| 35-44             | F      | 1a                    | 1.45 (1.09,1.82)                        | 1.16 (0.84,1.47)      | 0.71 (0.51,0.91)  |
| 35-44             | F      | 1b                    | 5.33 (3.62,9.39)                        | 3.93 (2.68,6.71)      | 1.30 (0.97,1.90)  |
| 35-44             | F      | 2a                    | 3.95 (3.00,4.87)                        | 3.16 (2.32,3.95)      | 1.89 (1.37,2.35)  |
| 35-44             | F      | 2b                    | 13.10 (9.50,18.94)                      | 9.60 (7.04,13.73)     | 3.31 (2.58,4.36)  |
| 35-44             | F      | 3a                    | 3.90 (2.92,4.89)                        | 1.16 (0.84,1.47)      | 0.71 (0.51,0.91)  |
| 35-44             | F      | 3b                    | 7.57 (5.73,11.61)                       | 3.93 (2.68,6.71)      | 1.30 (0.97,1.90)  |
| 45-54             | M      | 1a                    | 13.42 (10.09,16.89)                     | 6.99 (5.20,9.11)      | 3.50 (2.75,4.41)  |

|       |   |    |                        |                        |                      |
|-------|---|----|------------------------|------------------------|----------------------|
| 45-54 | M | 1b | 38.54 (29.32,50.41)    | 18.43 (14.25,23.77)    | 8.07 (6.21,10.34)    |
| 45-54 | M | 2a | 37.36 (28.37,46.57)    | 18.45 (13.92,23.38)    | 9.28 (7.30,11.50)    |
| 45-54 | M | 2b | 100.31 (79.13,125.99)  | 47.55 (37.66,59.63)    | 21.20 (16.59,26.44)  |
| 45-54 | M | 3a | 36.91 (27.44,47.13)    | 6.99 (5.20,9.11)       | 3.50 (2.75,4.41)     |
| 45-54 | M | 3b | 60.73 (47.97,74.50)    | 18.43 (14.25,23.77)    | 8.07 (6.21,10.34)    |
| 45-54 | F | 1a | 8.51 (6.54,10.92)      | 4.90 (3.73,6.23)       | 1.78 (1.40,2.20)     |
| 45-54 | F | 1b | 17.14 (13.82,21.14)    | 10.44 (8.32,13.49)     | 2.79 (2.31,3.34)     |
| 45-54 | F | 2a | 23.14 (17.95,29.08)    | 13.22 (10.32,16.41)    | 4.60 (3.67,5.61)     |
| 45-54 | F | 2b | 45.08 (37.18,53.87)    | 26.96 (22.16,33.29)    | 7.20 (6.05,8.49)     |
| 45-54 | F | 3a | 22.92 (17.41,29.40)    | 4.90 (3.73,6.23)       | 1.78 (1.40,2.20)     |
| 45-54 | F | 3b | 30.92 (24.97,37.61)    | 10.44 (8.32,13.49)     | 2.79 (2.31,3.34)     |
| 55-64 | M | 1a | 18.57 (13.83,23.56)    | 24.81 (18.47,30.86)    | 8.07 (6.12,9.74)     |
| 55-64 | M | 1b | 63.89 (45.71,86.60)    | 59.43 (44.83,77.42)    | 15.90 (12.30,19.84)  |
| 55-64 | M | 2a | 50.79 (38.06,63.77)    | 66.62 (50.09,81.68)    | 21.58 (16.56,25.79)  |
| 55-64 | M | 2b | 166.83 (122.96,216.16) | 156.32 (120.41,197.83) | 42.48 (33.15,52.12)  |
| 55-64 | M | 3a | 50.26 (37.21,64.59)    | 24.81 (18.47,30.86)    | 8.07 (6.12,9.74)     |
| 55-64 | M | 3b | 93.42 (71.55,119.90)   | 59.43 (44.83,77.42)    | 15.90 (12.30,19.84)  |
| 55-64 | F | 1a | 6.88 (4.83,9.01)       | 12.80 (9.69,16.08)     | 4.66 (3.55,5.69)     |
| 55-64 | F | 1b | 14.75 (10.63,19.30)    | 19.11 (15.00,23.89)    | 7.35 (6.03,8.90)     |
| 55-64 | F | 2a | 18.95 (13.40,24.47)    | 33.20 (25.48,40.74)    | 12.29 (9.50,14.83)   |
| 55-64 | F | 2b | 40.2 (29.53,51.61)     | 49.25 (39.46,59.73)    | 19.47 (16.17,23.27)  |
| 55-64 | F | 3a | 18.71 (12.94,24.77)    | 12.80 (9.69,16.08)     | 4.66 (3.55,5.69)     |
| 55-64 | F | 3b | 26.27 (19.56,33.28)    | 19.11 (15.00,23.89)    | 7.35 (6.03,8.90)     |
| 65-74 | M | 1a | 42.63 (31.69,55.34)    | 30.85 (23.41,39.28)    | 20.29 (15.73,25.08)  |
| 65-74 | M | 1b | 97.37 (71.25,130.97)   | 64.60 (48.92,84.17)    | 35.23 (27.29,43.57)  |
| 65-74 | M | 2a | 113.60 (84.81,144.48)  | 83.92 (64.17,105.28)   | 54.26 (42.56,66.30)  |
| 65-74 | M | 2b | 260.14 (193.64,342.16) | 174.93 (134.75,223.58) | 94.81 (74.22,116.33) |
| 65-74 | M | 3a | 112.45 (83.72,145.93)  | 30.85 (23.41,39.28)    | 20.29 (15.73,25.08)  |
| 65-74 | M | 3b | 165.32 (127.28,205.14) | 64.60 (48.92,84.17)    | 35.23 (27.29,43.57)  |
| 65-74 | F | 1a | 27.42 (20.92,34.48)    | 18.87 (14.67,23.31)    | 11.72 (9.02,14.59)   |
| 65-74 | F | 1b | 57.26 (44.15,149.86)   | 30.49 (24.83,36.84)    | 17.39 (13.80,21.03)  |
| 65-74 | F | 2a | 74.92 (58.07,92.60)    | 51.04 (40.20,62.20)    | 31.59 (24.47,38.77)  |
| 65-74 | F | 2b | 152.97 (119.91,284.42) | 82.49 (67.75,98.15)    | 47.02 (37.64,56.23)  |
| 65-74 | F | 3a | 74.29 (56.02,93.15)    | 18.87 (14.67,23.31)    | 11.72 (9.02,14.59)   |
| 65-74 | F | 3b | 103.04 (81.47,192.57)  | 30.49 (24.83,36.84)    | 17.39 (13.80,21.03)  |
| 75+   | M | 1a | 54.89 (39.42,72.57)    | 64.43 (50.97,77.50)    | 49.17 (39.79,57.82)  |
| 75+   | M | 1b | 90.17 (71.57,113.82)   | 99.69 (83.44,120.19)   | 75.00 (62.51,90.42)  |

|     |   |    |                        |                        |                        |
|-----|---|----|------------------------|------------------------|------------------------|
| 75+ | M | 2a | 154.79 (112.10,200.67) | 180.22 (143.90,214.52) | 134.49 (109.67,156.83) |
| 75+ | M | 2b | 253.90 (204.17,317.01) | 279.95 (235.65,334.62) | 208.27 (174.05,250.23) |
| 75+ | M | 3a | 152.80 (109.90,200.54) | 64.43 (50.97,77.50)    | 49.17 (39.79,57.82)    |
| 75+ | M | 3b | 186.78 (143.96,237.92) | 99.69 (83.44,120.19)   | 75.00 (62.51,90.42)    |
| 75+ | F | 1a | 49.94 (39.64,60.14)    | 59.43 (47.44,71.60)    | 43.58 (34.30,52.18)    |
| 75+ | F | 1b | 78.92 (64.35,93.07)    | 85.97 (70.26,101.14)   | 57.96 (46.69,69)       |
| 75+ | F | 2a | 138.91 (111.05,166.33) | 164.89 (132.59,197.34) | 120.47 (95.40,143.50)  |
| 75+ | F | 2b | 221.42 (181.66,259.84) | 240.09 (198.76,280.80) | 161.60 (130.50,190.49) |
| 75+ | F | 3a | 137.74 (107.74,167.42) | 59.43 (47.44,71.60)    | 43.58 (34.30,52.18)    |
| 75+ | F | 3b | 165.76 (134.45,196.52) | 85.97 (70.26,101.14)   | 57.96 (46.69,69.00)    |

\* Six policy interventions defined in Table 1: (1a) 10% subsidy, (1b) 10% subsidy and 10% tax, (2a) 30% subsidy, (2b) 30% subsidy and 30% tax, (3a) 10% subsidy and additional 30% subsidy for SNAP purchases, (3b) 10% subsidy, 10% tax, and additional 30% subsidy for SNAP purchases.

**Table S10.** All cardiometabolic disease (CMD) deaths averted (per 100k population, adjusted for differences in age and sex distribution across SNAP categories) for six food price subsidy and tax interventions.\*

|                                                                | SNAP participants | SNAP non-participants |                  |
|----------------------------------------------------------------|-------------------|-----------------------|------------------|
|                                                                |                   | Eligible              | Ineligible       |
| U.S. adult population in 2014 (1000s)                          | 21465             | 20677                 | 171559           |
| <b>CHD: Baseline</b><br>CHD deaths/y per 100k adults           | 345.8             | 299.1                 | 190.9            |
| Prevented deaths/y per 100k adults (95% UI)                    |                   |                       |                  |
| 1a. (10/0/0)                                                   | 11.5 (10.2,12.7)  | 11.3 (10.1,12.5)      | 7.3 (6.6,8)      |
| 1b. (10/10/0)                                                  | 29.7 (24.8,35.9)  | 25.5 (21.6,31.5)      | 12.9 (11.2,14.9) |
| 2a. (30/0/0)                                                   | 31.8 (28.4,35.2)  | 30.6 (27.4,33.8)      | 19.4 (17.6,21.2) |
| 2b. (30/30/0)                                                  | 76.6 (66.3,89.1)  | 65.7 (57.2,76.8)      | 33.5 (29.6,38.1) |
| 3a. (10/0/30)                                                  | 31.5 (27.8,35.4)  | 11.3 (10.1,12.5)      | 7.3 (6.6,8)      |
| 3b. (10/10/30)                                                 | 48.4 (43.2,55.4)  | 25.5 (21.6,31.5)      | 12.9 (11.2,14.9) |
| <b>Stroke: Baseline</b><br>Stroke deaths/y per 100k adults     | 112.7             | 105.2                 | 73.9             |
| Prevented deaths/y per 100k adults (95% UI)                    |                   |                       |                  |
| 1a. (10/0/0)                                                   | 8.5 (7.5,9.6)     | 9.6 (8.4,10.8)        | 6.1 (5.3,6.8)    |
| 1b. (10/10/0)                                                  | 9.0 (8,10.2)      | 10.1 (8.8,11.3)       | 6.3 (5.5,7.0)    |
| 2a. (30/0/0)                                                   | 22.8 (20.0,25.5)  | 24.9 (21.9,27.6)      | 15.8 (14.0,17.5) |
| 2b. (30/30/0)                                                  | 24.1 (21.4,26.9)  | 25.9 (23.0,28.8)      | 16.3 (14.4,18.0) |
| 3a. (10/0/30)                                                  | 22.5 (19.9,25.6)  | 9.6 (8.4,10.8)        | 6.1 (5.3,6.8)    |
| 3b. (10/10/30)                                                 | 23.0 (20.3,26)    | 10.1 (8.8,11.3)       | 6.3 (5.5,7.0)    |
| <b>Diabetes: Baseline</b><br>diabetes deaths/y per 100k adults | 108.2             | 77.6                  | 52.8             |

|                                                   |                  |                  |                 |
|---------------------------------------------------|------------------|------------------|-----------------|
| Prevented deaths/y<br>per 100k adults<br>(95% UI) |                  |                  |                 |
| 1a. (10/0/0)                                      | 1.3 (1.1,1.5)    | 1.0 (0.8,1.1)    | 0.7 (0.7,0.8)   |
| 1b. (10/10/0)                                     | 11.9 (9.7,15.8)  | 7.9 (6.4,11.1)   | 4.0 (3.3,5.2)   |
| 2a. (30/0/0)                                      | 3.7 (3.2,4.2)    | 2.8 (2.4,3.2)    | 2.1 (1.8,2.3)   |
| 2b. (30/30/0)                                     | 30.1 (25.6,36.1) | 20.1 (17.0,24.6) | 10.6 (9.1,12.7) |
| 3a. (10/0/30)                                     | 3.6 (3.1,4.2)    | 1.0 (0.8,1.1)    | 0.7 (0.7,0.8)   |
| 3b. (10/10/30)                                    | 14.0 (11.8,17.8) | 7.9 (6.4,11.1)   | 4 (3.3,5.2)     |

**CMD: Baseline**

|                                 |       |       |       |
|---------------------------------|-------|-------|-------|
| CMD deaths/y per<br>100k adults | 566.7 | 481.8 | 317.5 |
|---------------------------------|-------|-------|-------|

|                                                   |                     |                     |                  |
|---------------------------------------------------|---------------------|---------------------|------------------|
| Prevented deaths/y<br>per 100k adults<br>(95% UI) |                     |                     |                  |
| 1a. (10/0/0)                                      | 19.8 (18.4,21.4)    | 18.9 (17.4,20.4)    | 13.8 (12.8,14.9) |
| 1b. (10/10/0)                                     | 59.4 (53.4,69.2)    | 50.6 (45.1,61.2)    | 26.4 (24.2,29.3) |
| 2a. (30/0/0)                                      | 54.4 (50.7,58.8)    | 50.6 (47.0,54.6)    | 36.5 (34.0,39.2) |
| 2b. (30/30/0)                                     | 150.8 (138.2,166.0) | 127.6 (116.7,141.8) | 68.3 (63.2,74.0) |
| 3a. (10/0/30)                                     | 53.9 (50.1,58.7)    | 18.9 (17.4,20.4)    | 13.8 (12.8,14.9) |
| 3b. (10/10/30)                                    | 91.0 (84.4,101.4)   | 50.6 (45.1,61.2)    | 26.4 (24.2,29.3) |

\*See Table 4 for corresponding unadjusted results. In Table 4, mortality rates differed across SNAP participation and eligibility categories, in part because of differences in the age distribution across the categories. The SNAP-eligible non-participant category was older on average (see Table S7) and had higher mortality rates per 100k adults (see Table 4). The adjusted results in this table assume constant baseline age and sex distribution across SNAP categories.
